# Supplementary material
Source: MDPI journal article supplement (https://www.mdpi.com/2073-4344/11/9/1126)
Supplement: s1 [file s1]

# **Engineering of a novel magnetic bi-functional enzymatic nanobiocatalyst for the Highly Efficient Synthesis of Enantiopure (R)-3-quinuclidinol**

Qingman Li<sup>a,‡</sup>, Qihua Jiang<sup>b,‡</sup>, Pengcheng Gu<sup>c</sup>, Lianju Ma<sup>c,\*</sup>, Yiwu Wang<sup>c,\*</sup>

<sup>a</sup>The First Affiliated Hospital of Chongqing Medical University, Chongqing 400016, China;

lqm5858@163.com

<sup>b</sup>Department of Medicinal Chemistry, School of Pharmacy, Chongqing Medical University,

Chongqing 400016, PR China; 100877@cqmu.edu.cn

<sup>c</sup>Lab Teaching & Management Center of Chongqing Medical University, Chongqing 400016, China;

\*Corresponding author, E-mail: malianjucq@126.com; willwyw@qq.com

Tel: +86 23 6848 5161, Fax: +86 23 6571 3519.

<sup>‡</sup>Qingman Li and Qihua Jiang contributed equally to this work.

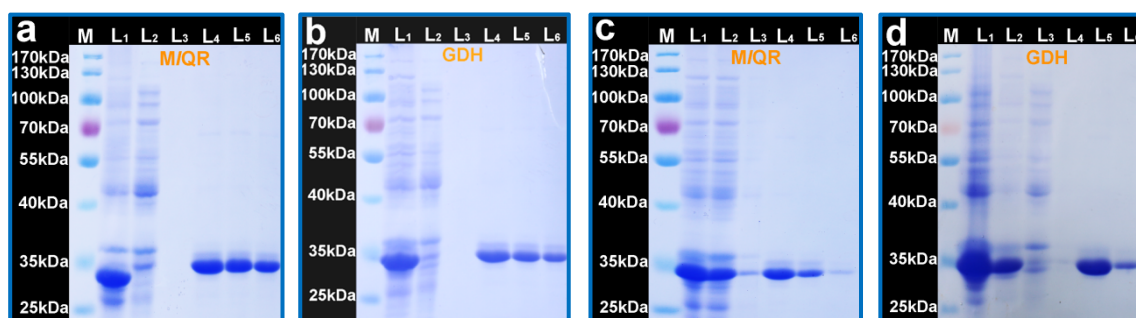

**Figure S1.** A comparison of the specificity of His<sub>6</sub>-tagged M/QR and GDH to different carrier. (a, b) Ni@MSN; (c, d) commercially available Ni<sup>2+</sup>-agarose bead. L<sub>M</sub>, protein molecular weight makers; L<sub>1</sub>, the cell lysates supernatant; L<sub>2</sub>, flow-through fractions, L<sub>3</sub>, L<sub>4-6</sub>, wash and elution fractions with 10 mM and 500 mM imidazole, respectively.

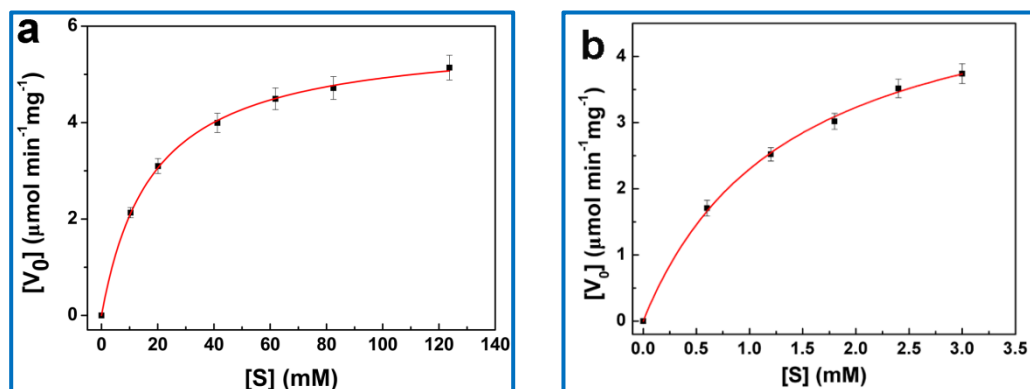

**Figure S2** The enzyme kinetics as the effect of substrate concentration on the activity of the bi-functional enzyme MLG. a) ketoreductase (M/QR) in the MLG at varying glucose concentrations in the range of 0.2 to 1.0 mM, b) cofactor regenerating enzyme (GDH) in the MLG at at varying glucose concentrations in the range of 0.2 to 1.0 mM.

**Table S1.** Porous features of Ni@MSN and MLG-Ni@MSN biocatalysts.

| Particles               | Surface area        | Pore volume | Pore size |
|-------------------------|---------------------|-------------|-----------|
|                         | (m <sup>2</sup> /g) | (mL/g)      | (nm)      |
| Ni@MSN                  | 70.6                | 0.30        | 16.71     |
| MLG-Ni@MSN biocatalysts | 68.1                | 0.36        | 21.40     |

**Table S2.** Kinetic parameters of the free MLG and the immobilized MLG.

|                                                                       | the free MLG |      | the immobilized MLG |          |
|-----------------------------------------------------------------------|--------------|------|---------------------|----------|
|                                                                       | M/QR         | GDH  | M/QR                | GDH      |
| K <sub>m</sub> (mM)                                                   | 12.06        | 1.62 | 18.06               | 1.36     |
| K <sub>cat</sub> (s <sup>-1</sup> )                                   | 4.70         | 9.85 | 6.39                | 5.98 1.6 |
| K <sub>cat</sub> /K <sub>m</sub> (s <sup>-1</sup> ·mM <sup>-1</sup> ) | 0.39         | 6.08 | 0.35                | 4.38 1.4 |
| V <sub>max</sub> (μmol s <sup>-1</sup> mg <sup>-1</sup> )             | 4.27         | 8.94 | 6.32                | 5.43 1.6 |
